# Supplementary material
Source: Springer Nature journal article supplement (https://www.springermedizin.de/resource/supplementary/12916_2011_373_MOESM2_ESM.pdf/9599812)
Supplement: MOESM2 [file 9599812]

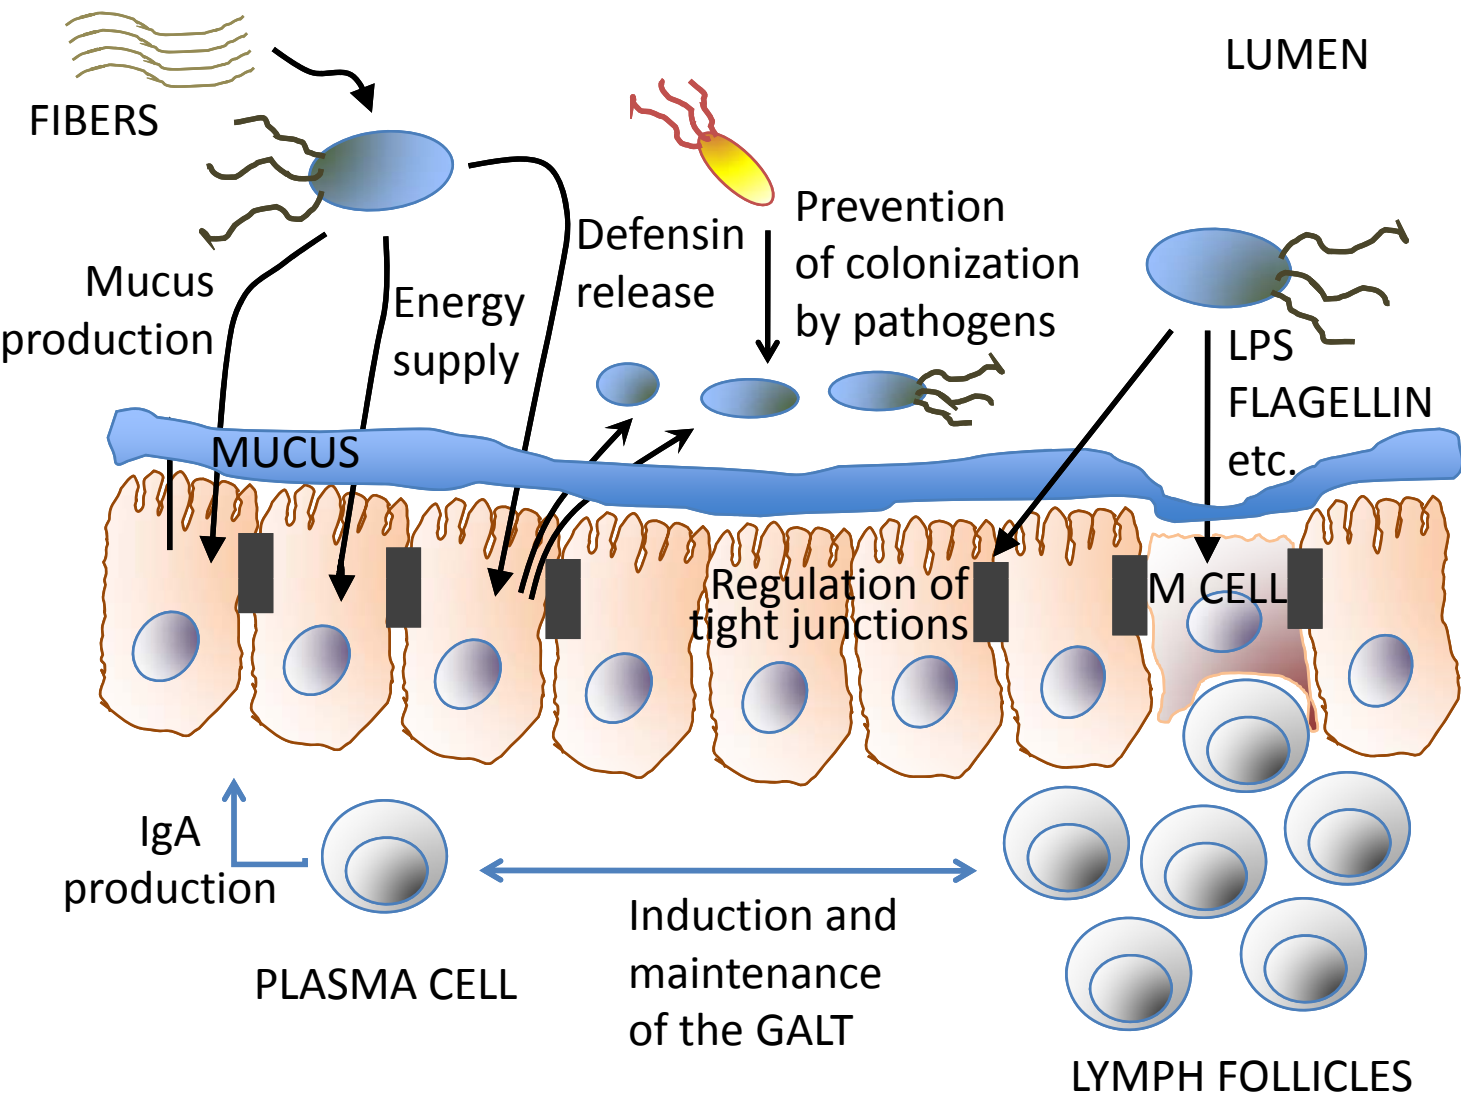

LUMEN

FIBERS

Mucus production

Energy supply

Defensin release

Prevention of colonization by pathogens

LPS  
FLAGELLIN  
etc.

MUCUS

Regulation of tight junctions

M CELL

IgA production

PLASMA CELL

Induction and maintenance of the GALT

LYMPH FOLLICLES
